# Supplementary material for: Nuclear genomic signals of the ‘microturbellarian’ roots of platyhelminth evolutionary innovation
Source: eLife. 2015 Mar 12;4:e05503. doi: 10.7554/eLife.05503 (PMC4398949; doi:10.7554/eLife.05503)
Supplement: Supplementary file 1. — Summary statistics and accession numbers for each species used in this study. Summarizes quality-controlled RNA-Seq data, de novo transcriptome assemblies, peptide predictions (incl. those from published genome data), and gene occupancy in the 516-orthogroup matrix. Libraries marked with a single asterisk represent stranded libraries made using the IntegenX mRNA sample prep kit, whereas those marked with two asterices represent libraries prepared from amplified cDNA made using the PMA method (Pan et al., 2013); all other libraries were produced using the Illumina TruSeq RNA Sample Prep Kit v2. DOI: http://dx.doi.org/10.7554/eLife.05503.011 [file elife05503s001.xlsx]

## Sheet: Sheet1
Species	MCZ IZ Accession Number	BioProject Accession ID	Duplicate read percentage	Total (F&R) reads passing filters	Contig N50 (bp)	Transcripts	Trinity components	GC%	Longest transcript (bp)	Total size (Mb)	Peptides passing filters	N50 (AA)	Occupancy in 516 gene matrix
Austrognathia sp.*	27354	PRJNA277630	82.9648	38704930	430	31519	25029	48.44	13279	12.9	9859	168	98
Bdelloura candida**	49466	PRJNA277606	30.7656	7508921	682	41385	27822	32.63	5894	22.2	11076	259	102
Bothriomolus balticus**	49468	PRJNA277605	42.6079	4660510	542	24232	17695	39.66	3321	11.3	4771	198	141
Bothrioplana semperi	26601	PRJNA277632	52.1932	51785091	777	96345	71688	48.86	18253	56.1	19364	325	380
Dendrocoelum lacteum	-	PRJNA207765	-	1223901548	908	161699	125886	35.33	29521	98.3	27087	517	395
Fascioloides magna	-	SAMN00993415 (BioSample)	25.0553	52912990	1362	42206	34763	45.68	9872	33	13348	459	388
Geocentrophora applanata	26504	PRJNA277633	2.6755	54844336	1151	121618	104483	34.9	20522	84.8	31359	446	388
Gnosonesimida sp. IV	27293	PRJNA277634	28.4711	86540055	1069	71849	43798	44.11	20334	49.4	17711	428	354
Kronborgia cf. amphipodicola*	27294	PRJNA277608	59.856	76493917	1104	76621	43071	38.46	13389	51.3	12321	486	343
Lehardyia sp.**	49457	PRJNA277603	62.1131	3384301	599	18578	14056	41.09	4994	9.3	4609	202	83
Lepadella patella*	27356	PRJNA277607	85.2665	53967372	361	5074	4285	45.69	3628	1.8	896	157	64
Lepidodermella sp.	-	PRJNA277639	-	385912964	1502	65968	46873	45.2	15688	61.2	25909	446	320
Macrostomum cf. ruebushi*	26860	PRJNA277604	23.8276	38054214	423	81665	60434	52.11	13428	32.8	14460	163	211
Microdalyellia sp.**	49458	PRJNA277602	40.0725	4797354	845	24895	17212	33.44	7826	15.9	9407	261	124
Microstomum lineare*	26916	PRJNA277601	39.5581	29993579	1011	160666	89897	39.65	9919	104.6	28253	320	323
Monocelis fusca	26672	PRJNA277600	17.6753	32835281	1277	136248	55635	38.84	21050	107.3	21570	416	336
Prorhynchus alpinus*	26514	PRJNA277599	20.2377	45118963	579	68518	46363	39.66	15528	33.2	20862	222	309
Prorhynchus sp. I	26438/26494	PRJNA277598	45.364	202221431	680	69820	52204	36.82	19085	35.9	19571	289	333
Prosogynopora riseri**	49556	PRJNA277597	44.0659	4415065	655	22446	16176	42.99	6400	11.8	5071	217	118
Prostheceraeus vittatus	-	PRJNA277637	11.0032	378256191	991	570808	458124	38.88	34144	361.8	37209	471	427
Protomonotresidae sp. nov*	27128	PRJNA277596	61.5313	43070684	635	50012	32032	39.58	7977	26	15242	227	238
Provortex cf. sphagnorum**	49558	PRJNA277595	53.099	1960306	732	6480	5035	36.28	7352	3.7	1713	229	34
Rhynchomesostoma rostratum*	26830	PRJNA277594	17.0893	32964646	661	103098	57605	39.27	12103	54.5	25492	248	315
Schmidtea mediterranea	-	Unpublished (A. Sánchez Alvarado)	-	235920240	1362	104778	79132	33.29	16157	80.7	17400	577	363
Solenopharyngidae sp.**	49559	PRJNA277592	30.4755	5338858	729	27389	20095	41.56	5870	15.2	8953	246	106
Stenostomum leucops	26515	PRJNA276469	29.4315	46432154	1869	77816	51365	48.84	24826	79.1	21396	513	313
Stylochoplana maculata	-	SAMN02739901	71.4427	619236	746	17098	14437	47.23	3759	10.4	6565	219	221
Stylochus ellipticus	26518/26521	PRJNA277586	39.8519	122943756	1786	148122	95231	48.95	15817	129.6	20392	526	395
Xenoprorhynchus sp. I*	26513	PRJNA277588	28.7781	28509035	518	45725	33378	37.69	7294	21	15572	193	235
Brachionus plicatilis	-	-	-	-	841	9843	-	35.12	3042	7.9	7796	240	248
Neobenedenia melleni	-	-	-	-	921	483	-	43.2	2541	0.4	314	234	6
Capitella teleta	-	-	-	-	-	-	-	-	-	-	32415	450	394
Clonorchis sinensis	-	-	-	-	-	-	-	-	-	-	13646	734	252
Echinococcus multilocularis	-	-	-	-	-	-	-	-	-	-	10535	730	421
Gyrodactylus salaris	-	-	-	-	-	-	-	-	-	-	15488	445	301
Helobdella robusta	-	-	-	-	-	-	-	-	-	-	23432	507	392
Hymenolepis microstoma	-	-	-	-	-	-	-	-	-	-	10142	725	370
Lottia gigantea	-	-	-	-	-	-	-	-	-	-	23842	490	401
Schistosoma mansoni	-	-	-	-	-	-	-	-	-	-	10802	738	407
Taenia solium	-	-	-	-	-	-	-	-	-	-	12353	604	436
