# Supplementary figures and images for: Nuclear genomic signals of the ‘microturbellarian’ roots of platyhelminth evolutionary innovation
Source: eLife journal article supplement (doi:10.7554/elife.05503), 2015-03-12

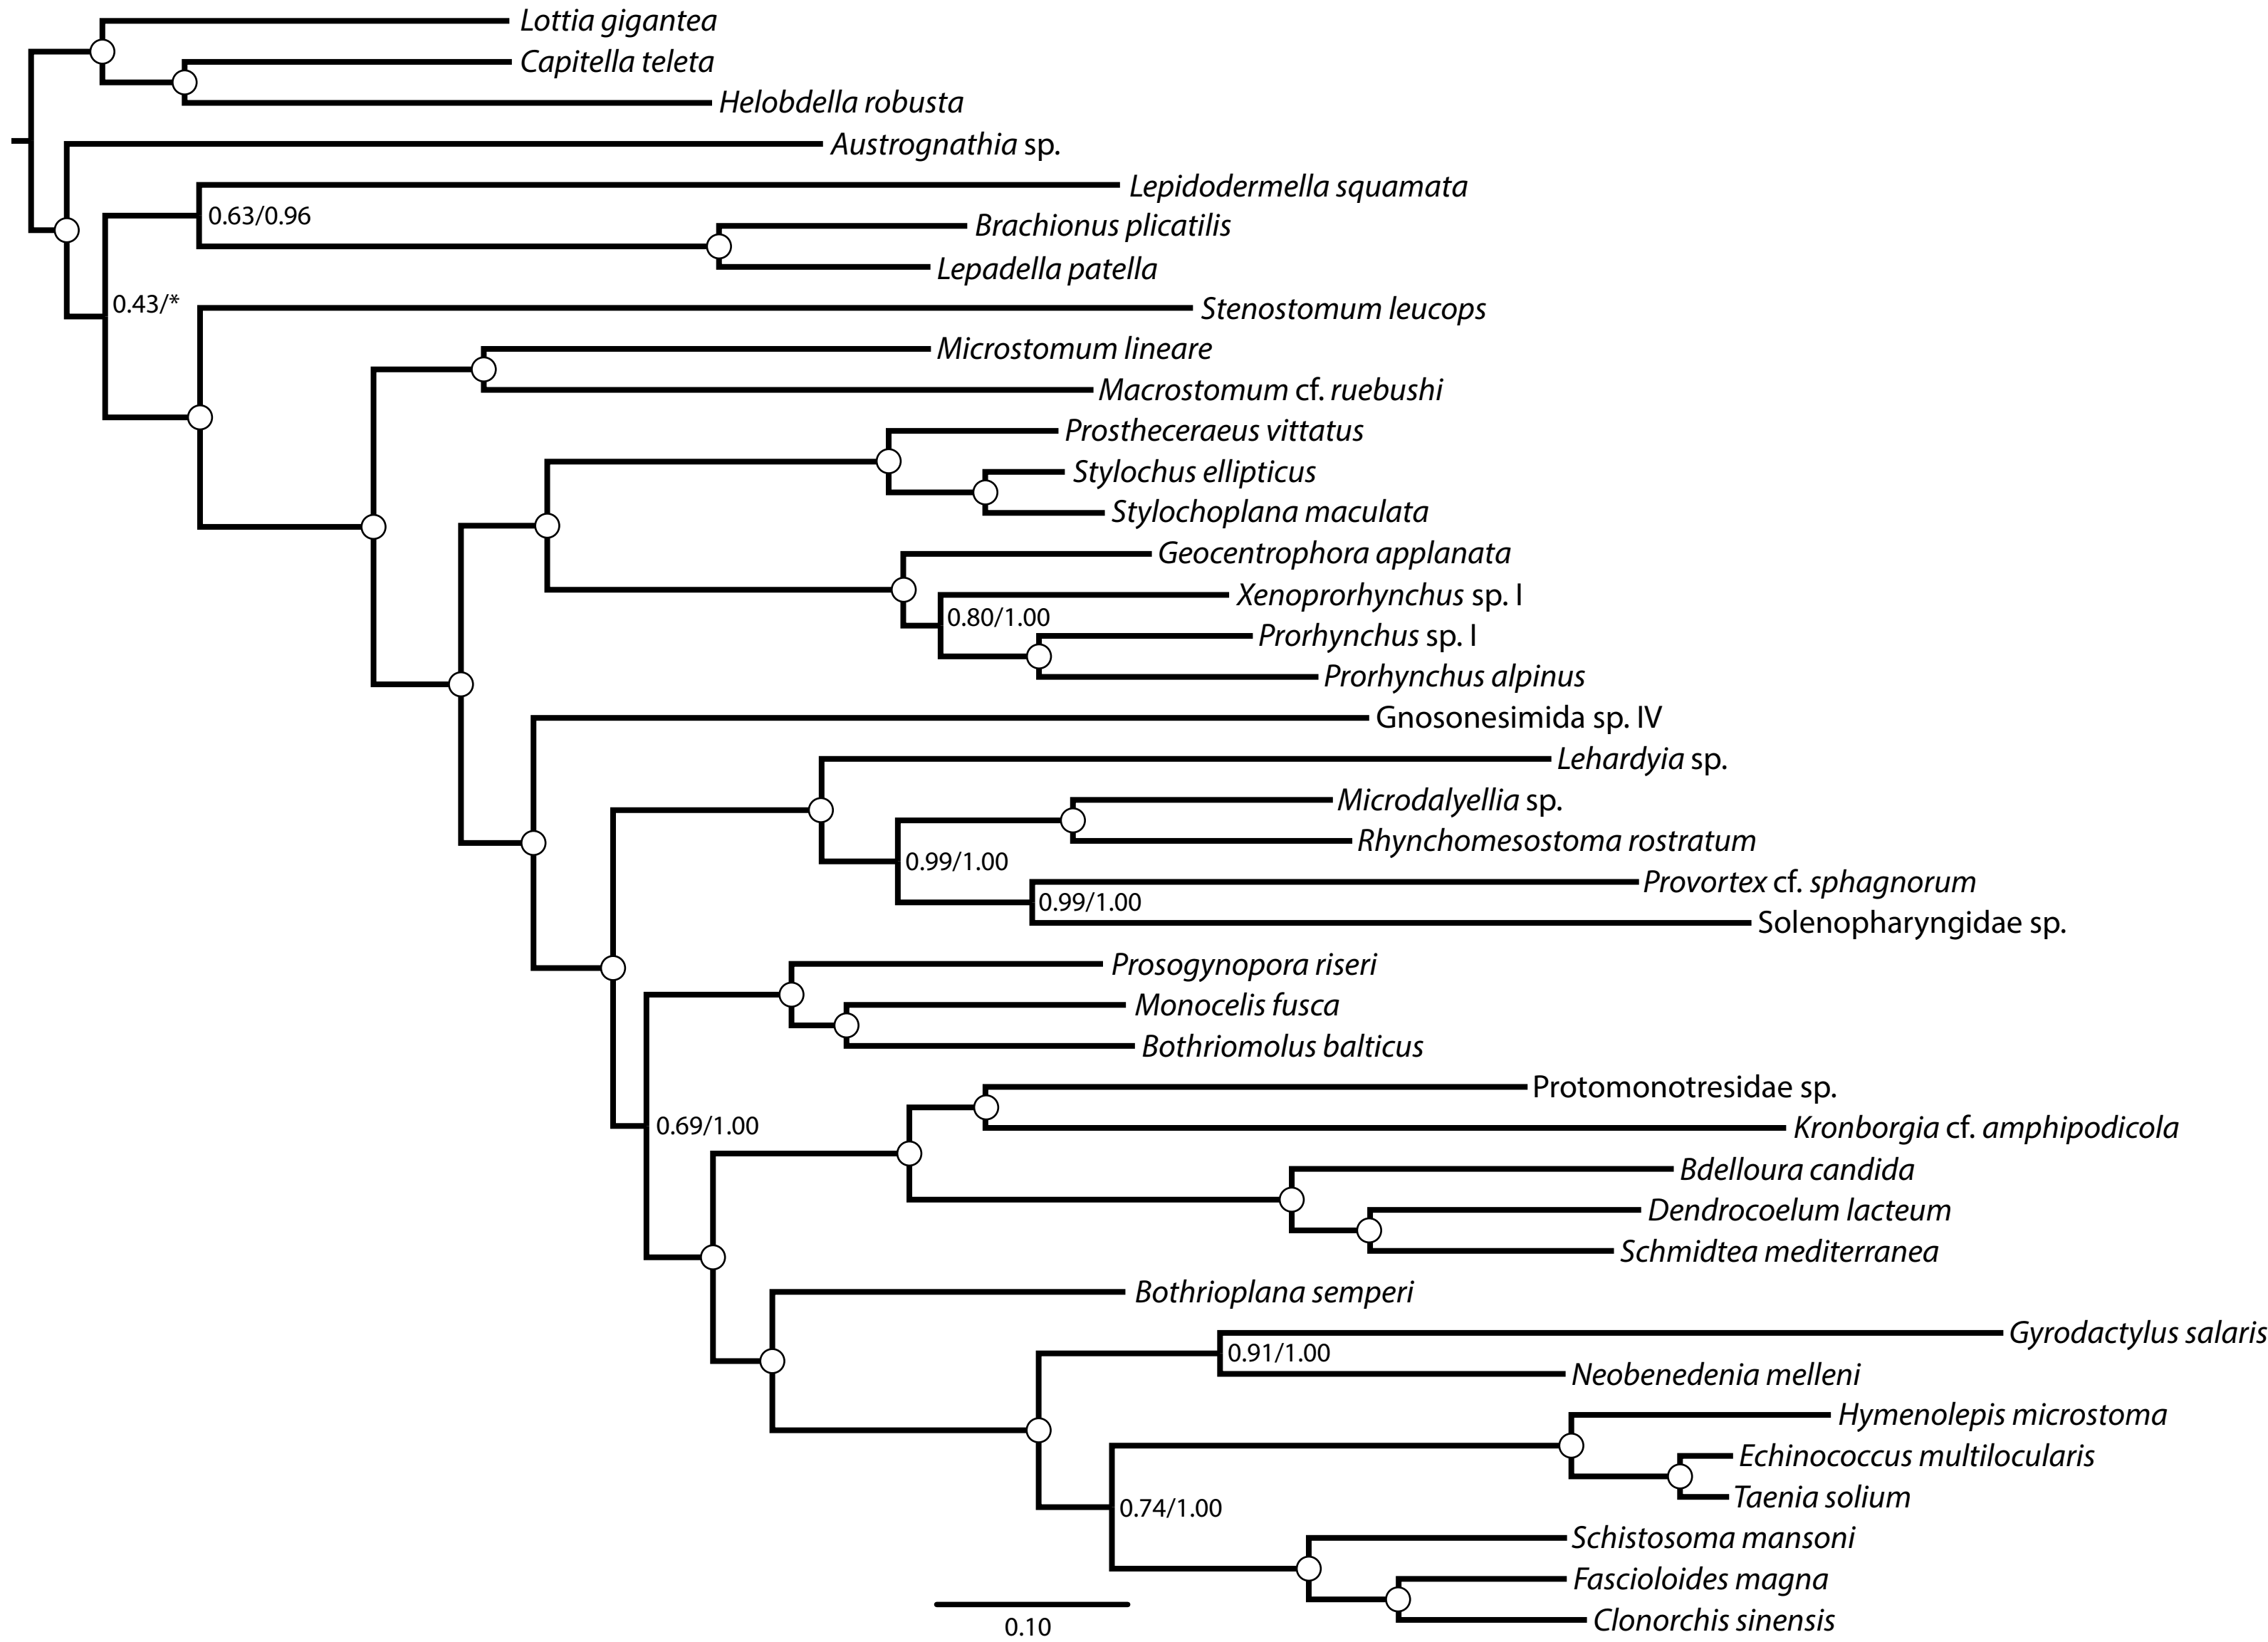

Supplement: supp [file elife_poa_e05503_Figure_1_figure_supplement_1.pdf › elife_poa_e05503_Figure_1_figure_supplement_1.pdf]

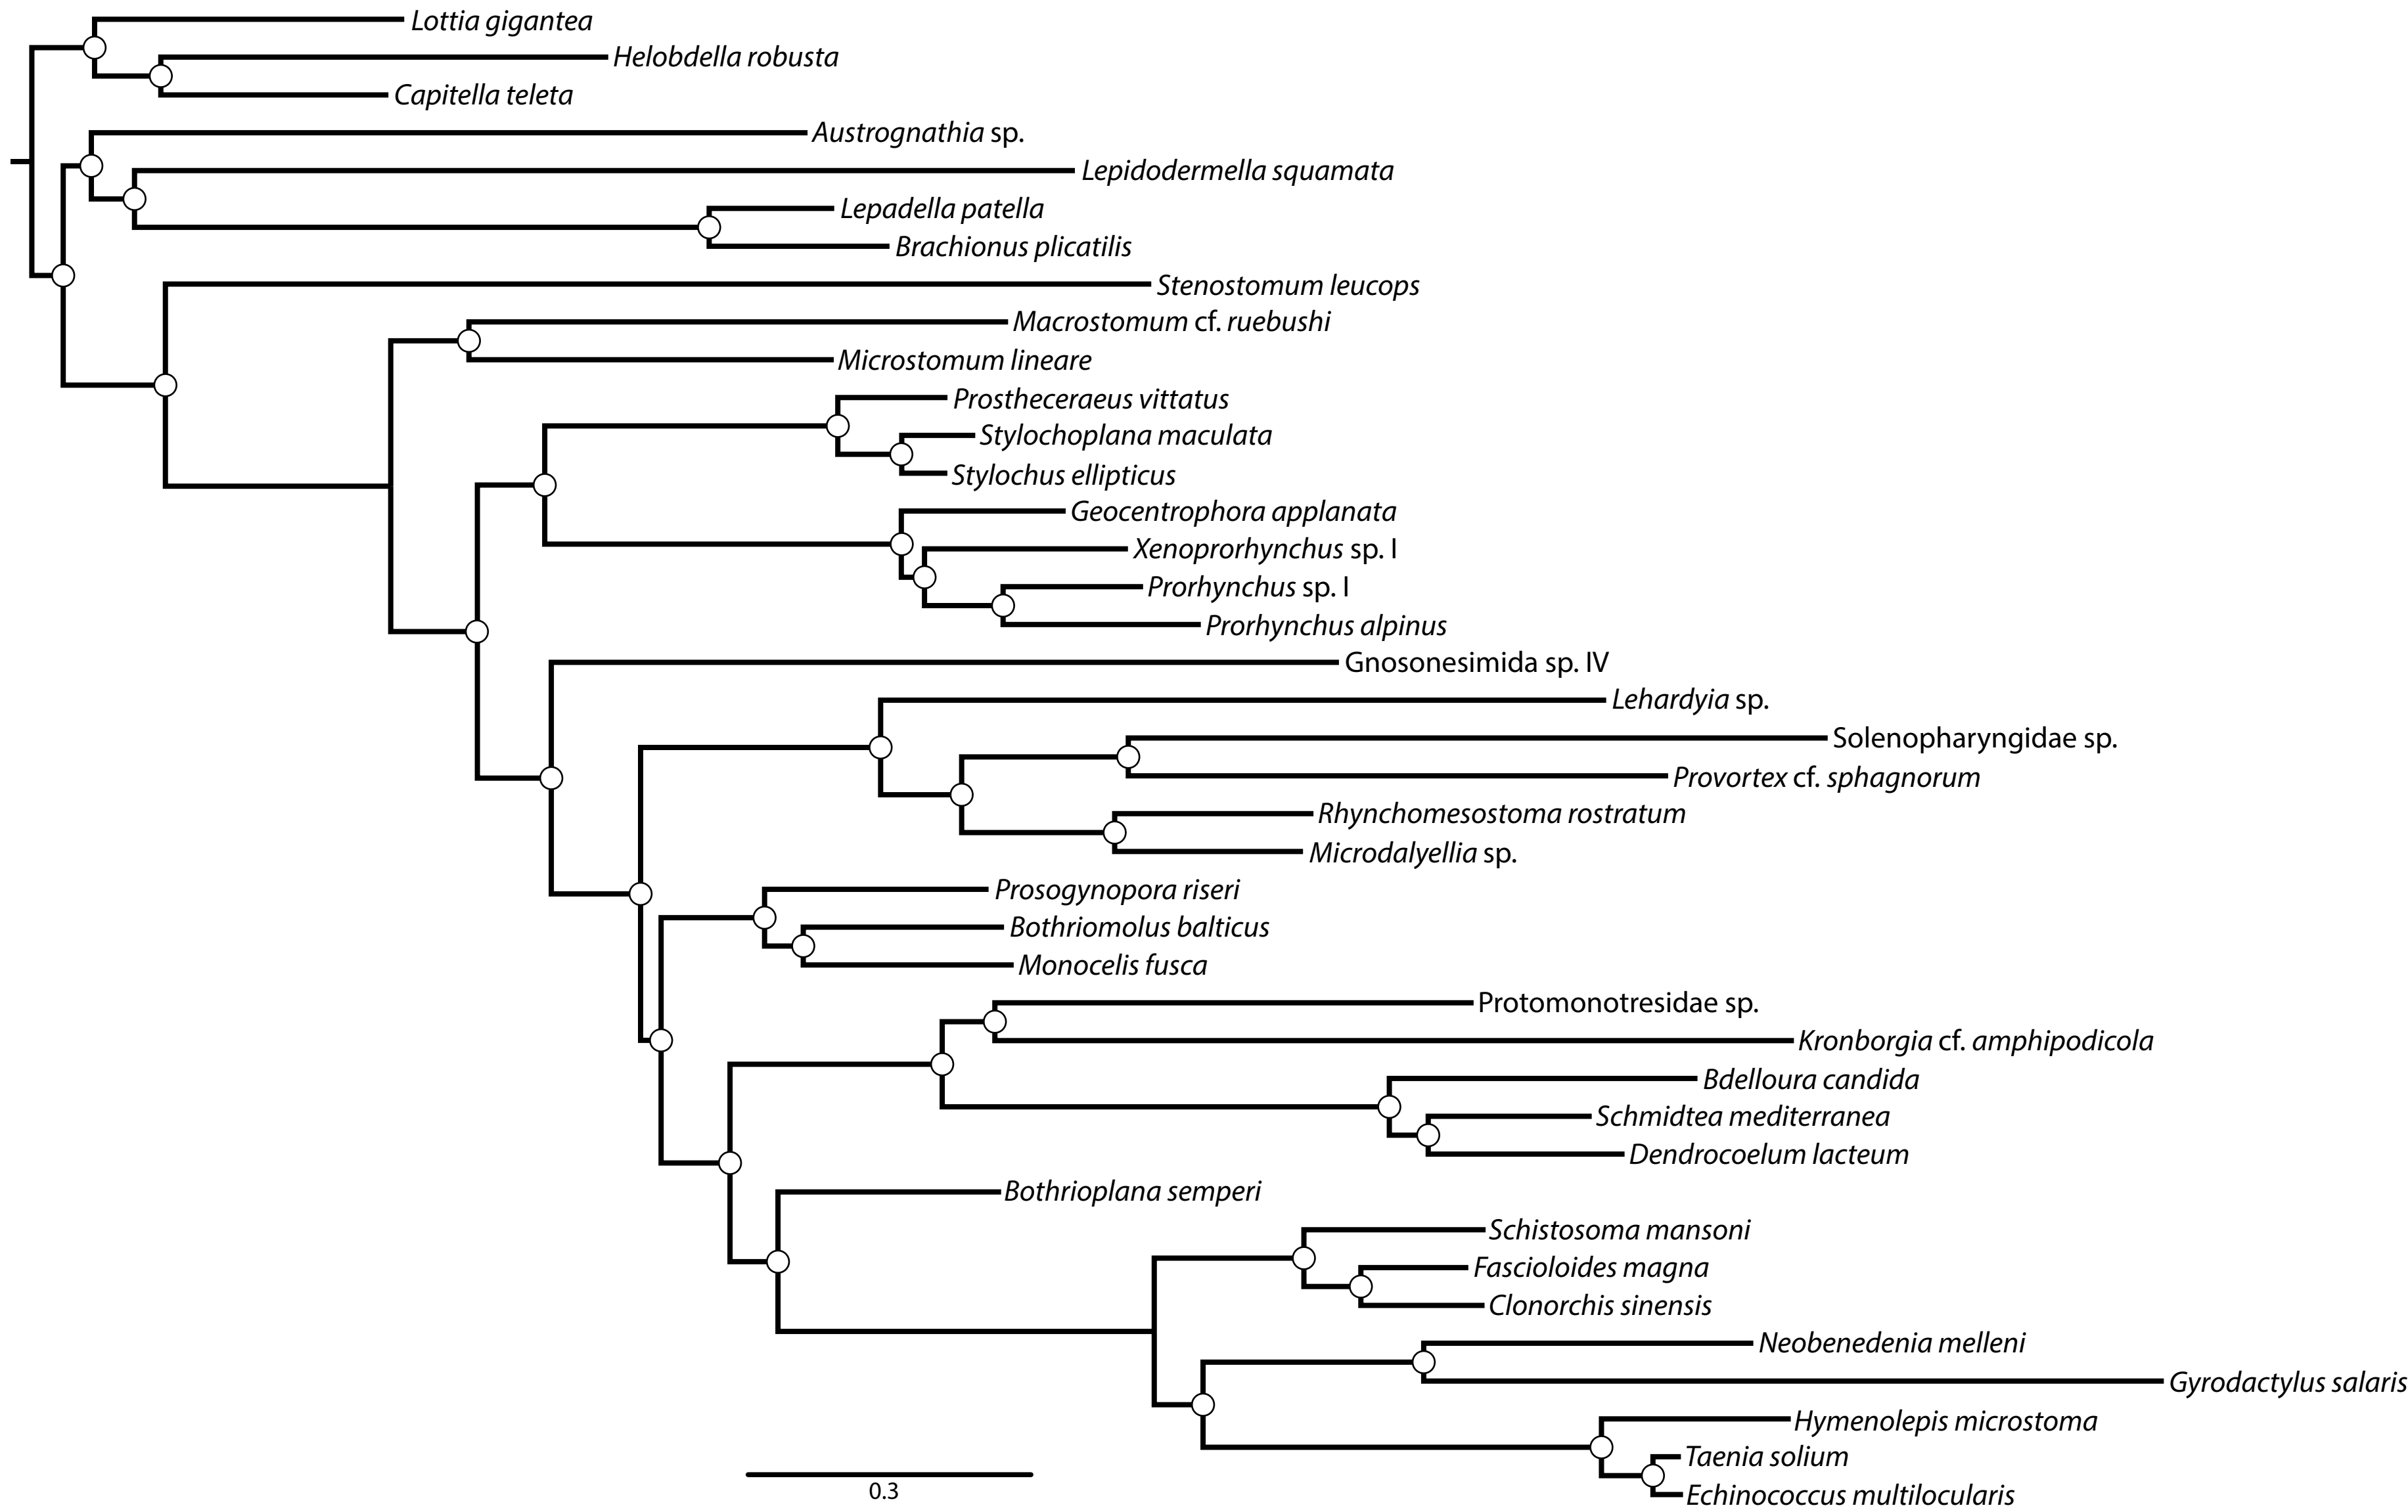

Supplement: supp [file elife_poa_e05503_Figure_1_figure_supplement_2.pdf › elife_poa_e05503_Figure_1_figure_supplement_2.pdf]
